# Supplementary material
Source: PubMed Central journal article supplement (PMC3082773)
Supplement: NIHMS285513-supplement-1.pdf [file NIHMS285513-supplement-1.pdf]

# SUPPLEMENTAL MATERIAL

## SUPPLEMENTAL TABLES

### Appendix 1. Characteristics of included studies

| Source                                      | Mean Age, y | Female % | No. of Patients | Years of Diagnosis | AF Type                     | AF Incidence Any/New/Prior | AF Evaluation | Mortality Measures | Selection | Comparability | Outcome Ascertainment <sup>(1)</sup> | Newcastle-Ottawa Scale |
|---------------------------------------------|-------------|----------|-----------------|--------------------|-----------------------------|----------------------------|---------------|--------------------|-----------|---------------|--------------------------------------|------------------------|
| <b>Randomized Trials</b>                    |             |          |                 |                    |                             |                            |               |                    |           |               |                                      |                        |
| Crenshaw, <sup>2</sup> 1997                 | 62          | 25       | 40891           | 1990-1993          | Any                         | 10%/NR/NR                  | Hosp          | 30 d               | 3         | 1             | 2                                    | 6                      |
| Pedersen, <sup>11</sup> 1999*               | 69          | 42       | 6676            | 1990-1992          | Any/New <sup>#</sup> /Prior | 21%/17%/4%                 | Hosp          | Hosp, 5 y          | 3         | 2             | 3                                    | 8                      |
| Wong, <sup>7</sup> 2000*                    | 63          | 27       | 13858           | 1995-1997          | New                         | NR/7%/NR                   | Hosp          | 30 d, 1 y          | 3         | 2             | 3                                    | 8                      |
| Pizzetti, <sup>5</sup> 2001*                | NR          | 22       | 17749           | 1991-1993          | New                         | NR/8%/NR                   | Hosp          | Hosp, 6 m, 4 y     | 3         | 2             | 3                                    | 8                      |
| Lehto, <sup>9</sup> 2005*                   | 67          | 29       | 5477            | 1998-1999          | Any/New <sup>#</sup> /Prior | NR/7%/12%                  | 3 y           | 30 d, 3 y          | 3         | 2             | 3                                    | 8                      |
| Kober, <sup>17</sup> 2006                   | 67          | 32       | 14660           | 1998-2001          | Any/New/Prior               | 15%/12%/2%                 | 10 d          | 3 y                | 3         | 2             | 3                                    | 8                      |
| Tangelder, <sup>24</sup> 2008               | 67          | 31       | 1883            | 2001-2002          | New                         | NR/9%/NR                   | R             | 6 m                | 3         | 0             | 2                                    | 5                      |
| Lopes, <sup>23</sup> 2009                   | 61          | 24       | 5745            | 2004-2006          | Any/New/Prior               | 11%/6%/5%                  | 14 d          | 90 d               | 3         | 2             | 2                                    | 7                      |
| <b>Non Randomized Trials</b>                |             |          |                 |                    |                             |                            |               |                    |           |               |                                      |                        |
| <b>Community studies</b>                    |             |          |                 |                    |                             |                            |               |                    |           |               |                                      |                        |
| Goldberg, <sup>28</sup> 1990                | 66          | 47       | 4108            | 1975-1986          | Any/New                     | 16%/9%/NR                  | Hosp          | Hosp, 5 y          | 3         | 2             | 3                                    | 8                      |
| Saczynski, <sup>12</sup> 2009               | 69          | 43       | 7513            | 1990-2005          | New <sup>#</sup>            | NR/13%/NR                  | Hosp          | Hosp, 1 y, 5 y     | 3         | 2             | 2                                    | 7                      |
| <b>Registries</b>                           |             |          |                 |                    |                             |                            |               |                    |           |               |                                      |                        |
| Behar, <sup>1</sup> 1992                    | 64          | 26       | 5803            | 1981-1983          | New <sup>#</sup>            | NR/10%/NR                  | Hosp          | Hosp, 1y, 6 y      | 4         | 2             | 3                                    | 8                      |
| Eldar, <sup>3</sup> 1998                    | 63          | 26       | 2866            | 1992-1996          | New <sup>#</sup>            | NR/9%/NR                   | CCU           | 30 d, 1y           | 4         | 2             | 3                                    | 8                      |
| Rathore, <sup>6</sup> 2000*                 | 77          | 50       | 106780          | 1994-1996          | Any/New/Prior               | 22%/11%/11%                | Hosp          | Hosp, 1 y          | 2         | 2             | 1                                    | 5                      |
| Mehta, <sup>10</sup> 2003*                  | 65          | 32       | 21785           | 1999-2001          | New <sup>#</sup> /Prior     | NR/6%/8%                   | Hosp          | Hosp               | 3         | 2             | 2                                    | 7                      |
| Kinjo, <sup>4</sup> 2003*                   | 64          | 23       | 2475            | 1998-2002          | Any/New                     | 12%/8%/NR                  | Hosp          | Hosp, 1 y          | 3         | 2             | 3                                    | 8                      |
| Lau, <sup>32</sup> 2009                     | 65          | 36       | 3230            | 2005-2007          | New <sup>#</sup> /Prior     | NR/4%/11%                  | Hosp          | Hosp, 1 y          | 3         | 2             | 2                                    | 7                      |
| <b>Convenience sample</b>                   |             |          |                 |                    |                             |                            |               |                    |           |               |                                      |                        |
| Klass, <sup>30</sup> 1970                   | 66          | NR       | 409             | 1966-1968          | New <sup>#</sup> /Prior     | NR/8%/1%                   | Hosp          | Hosp               | 3         | 0             | 1                                    | 4                      |
| Cristal, <sup>27</sup> 1976*                | 60          | 24       | 318             | NR                 | New <sup>#</sup>            | NR/11%/NR                  | CCU           | Hosp               | 3         | 0             | 2                                    | 5                      |
| Liem, <sup>48</sup> 1976 <sup>□</sup>       | 68          | 29       | 700             | 1972-1974          | New <sup>#</sup>            | NR/8%/NR                   | 5 d           | Hosp               | 2         | 0             | 2                                    | 4                      |
| Liberthson, <sup>33</sup> 1976              | 64          | NR       | 917             | 1968-1974          | New <sup>#</sup>            | NR/6%/NR                   | CCU           | Hosp               | 3         | 0             | 2                                    | 5                      |
| Hunt, <sup>29</sup> 1978                    | NR          | NR       | 969             | 1972-1975          | Any                         | 11%/NR/NR                  | CCU           | Hosp, 1y           | 3         | 0             | 3                                    | 6                      |
| Sugiura, <sup>42</sup> 1985                 | 63          | 39       | 102             | NR                 | New                         | NR/18%/NR                  | 3 d           | Hosp               | 3         | 2             | 2                                    | 7                      |
| Bigger, <sup>25</sup> 1985                  | NR          | 23       | 504             | 1974-1980          | Any                         | 4%/NR/NR                   | CCU           | 3 y                | 3         | 2             | 3                                    | 8                      |
| Nielsen, <sup>49</sup> 1991 <sup>□</sup>    | 60          | 22       | 152             | 1988-1989          | Any                         | 9%/NR/NR                   | CCU           | Hosp               | 3         | 0             | 2                                    | 5                      |
| Petretta, <sup>36</sup> 1991                | 66          | 25       | 275             | 1985-1988          | Any                         | NR/NR/NR                   | NR            | Hosp               | 3         | 0             | 2                                    | 5                      |
| Kobayashi, <sup>47</sup> 1992* <sup>□</sup> | 64          | 14       | 127             | 1984-1987          | New <sup>#</sup>            | NR/18%/NR                  | CCU           | Hosp               | 2         | 0             | 2                                    | 4                      |
| Suarez, <sup>41</sup> 1995                  | 74          | 30       | 322             | 1988-1991          | Any                         | NR/NR/NR                   | NR            | Hosp               | 3         | 0             | 2                                    | 5                      |
| Madias, <sup>34</sup> 1996                  | 64          | 30       | 517             | NR                 | Any/New                     | 14%/11%/NR                 | Hosp          | Hosp               | 3         | 0             | 2                                    | 5                      |
| Sakata, <sup>38</sup> 1997                  | 66          | 25       | 1039            | 1985-1995          | Any/New/Prior               | 10%/8%/1%                  | Hosp          | Hosp, 8 y          | 3         | 2             | 2                                    | 7                      |
| Galcerá Thomas, <sup>45</sup> 1999          | 65          | 23       | 1239            | 1992-1994          | Any                         | 8%/NR/NR                   | Hosp          | Hosp, 1 y          | 3         | 0             | 2                                    | 5                      |

## Appendix 1. Continued

| Source                                  | Mean Age, y | Female % | No. of Patients | Years of Diagnosis | AF Type                     | AF Incidence Any/New/Prior | AF Evaluation | Mortality Measures | Selection | Comparability | Outcome Ascertainment <sup>□</sup> | Newcastle-Ottawa Scale |
|-----------------------------------------|-------------|----------|-----------------|--------------------|-----------------------------|----------------------------|---------------|--------------------|-----------|---------------|------------------------------------|------------------------|
| Mahon, <sup>35</sup> 2000               | 67          | 40       | 852             | 1992-1994          | Any                         | 20%/NR/NR                  | Hosp          | Hosp               | 3         | 2             | 2                                  | 7                      |
| Janion, <sup>46</sup> 2001              | 59          | 28       | 881             | 1992-1996          | Any                         | 12%/NR/NR                  | Hosp          | Hosp, 1 y, 6 y     | 3         | 1             | 2                                  | 6                      |
| Cicek, <sup>26</sup> 2003               | 59          | 23       | 100             | NR                 | New <sup>#</sup>            | NR/19%/NR                  | Hosp          | 30 d               | 3         | 0             | 1                                  | 4                      |
| Asanin, <sup>13</sup> 2005 <sup>□</sup> | 64          | 31       | 650             | 1996-1998          | New <sup>#</sup>            | NR/10%/NR                  | CCU           | Hosp, 7 y          | 1         | 2             | 2                                  | 5                      |
| Rastenyte, <sup>37</sup> 2005*          | 54          | 25       | 2008            | 1983-1992          | Any                         | 7%/NR/NR                   | Hosp          | 1 y                | 4         | 0             | 2                                  | 7                      |
| Trappolini, <sup>15</sup> 2006          | 75          | 25       | 848             | 2000-2003          | New <sup>#</sup>            | NR/10%/NR                  | CCU           | Hosp               | 3         | 2             | 2                                  | 7                      |
| Siu, <sup>40</sup> 2007                 | 64          | 25       | 431             | 1997-2005          | New <sup>#</sup>            | NR/14%/NR                  | Hosp          | 3 y                | 3         | 0             | 3                                  | 6                      |
| Li, <sup>14</sup> 2008                  | 74          | 36       | 967             | 2001-2006          | Any/New <sup>#</sup> /Prior | 10%/7%/4%                  | Hosp          | Hosp               | 3         | 2             | 2                                  | 7                      |
| Sankaranarayanan, <sup>39</sup> 2008    | 68          | 28       | 500             | 2000-2001          | Any/New/Prior               | 25%/11%/13%                | Hosp          | Hosp, 1 y, 6 y     | 3         | 0             | 3                                  | 6                      |
| Koracevic, <sup>31</sup> 2008           | 64          | 45       | 543             | 2000-2005          | Any                         | 11%/NR/NR                  | NR            | Hosp               | 3         | 0             | 2                                  | 5                      |
| Torres, <sup>43</sup> 2008              | 65          | 28       | 1183            | 2003-2005          | Any                         | 12%/NR/NR                  | 2 d           | Hosp, 6 m          | 3         | 2             | 2                                  | 7                      |
| Cui, <sup>44</sup> 2008*                | 63          | 30       | 297             | 2001-2005          | Any                         | 11%/NR/NR                  | 10 d          | 30 d, 6 m          | 3         | 0             | 1                                  | 4                      |
| Berton, <sup>8</sup> 2009*              | 70          | 29       | 505             | 1995-1998          | Any/New                     | 13%/9%/NR                  | 7 d           | Hosp, 7 y          | 3         | 2             | 3                                  | 8                      |

AF, Atrial Fibrillation; MI, Myocardial Infarction; NR, Not Reported; R, Until randomization; Hosp, during hospitalization; d, days; m, months; y, years; CCU, Coronary Care Unit stay.  
 Any AF=AF during the MI; New AF=AF occurring after the MI; Prior AF=Pre-existing AF to MI.

\*Studies that evaluated Atrial Fibrillation and/or Atrial Flutter

For the purpose of this study, we dealt with studies derived from Randomized Trials as observational studies.

<sup>□</sup>Exposure ascertainment for case-control studies

<sup>#</sup>New AF with no history of AF prior to MI.

## Appendix 2. Factors adjusted for in the included studies

| Source                         | Adjustment Variables                                                                                                                                                                                                                                                                                                                                                                                                                                                                                                                                                                                                                                                                                                                                                                                                                                                                                                                                                                                                                                            |
|--------------------------------|-----------------------------------------------------------------------------------------------------------------------------------------------------------------------------------------------------------------------------------------------------------------------------------------------------------------------------------------------------------------------------------------------------------------------------------------------------------------------------------------------------------------------------------------------------------------------------------------------------------------------------------------------------------------------------------------------------------------------------------------------------------------------------------------------------------------------------------------------------------------------------------------------------------------------------------------------------------------------------------------------------------------------------------------------------------------|
| <b>Randomized Trials</b>       |                                                                                                                                                                                                                                                                                                                                                                                                                                                                                                                                                                                                                                                                                                                                                                                                                                                                                                                                                                                                                                                                 |
| Crenshaw, <sup>2</sup> 1997*#  | Age-Gender-Heart Rate-Killip class-Current smoker-Former smoker-Systolic Blood Pressure-Diastolic Blood Pressure-Hypertension-Previous MI-Diabetes-Weight-Height-MI location-Peak Creatine Kinase level-Time to Thrombolytic therapy-Thrombolytic therapy                                                                                                                                                                                                                                                                                                                                                                                                                                                                                                                                                                                                                                                                                                                                                                                                       |
| Pedersen, <sup>11</sup> 1999*# | Age-Gender-Wall Motion Index-Thrombolytic therapy-Previous MI-Hx Angina Pectoris-Hx Hypertension-Hx Diabetes Mellitus-Congestive Heart Failure-Ventricular Fibrillation-Ventricular Tachycardia                                                                                                                                                                                                                                                                                                                                                                                                                                                                                                                                                                                                                                                                                                                                                                                                                                                                 |
| Wong, <sup>7</sup> 2000        | Age-Systolic Blood Pressure-Weight-Killip class-Heart Rate-Infarct location-Hypertension-Diabetes Mellitus-Prior angioplasty-Prior Cerebrovascular Disease-Prior bypass surgery-Recurrent Angina-Reinfarction-Worsening Heart Failure-Hypotension-Shock-Third degree Heart Block-Ventricular Fibrillation-Severe Bleeding                                                                                                                                                                                                                                                                                                                                                                                                                                                                                                                                                                                                                                                                                                                                       |
| Pizzetti, <sup>5</sup> 2001    | Age-Gender-MI location-Previous MI-Hx Hypertension-Hx Diabetes Mellitus-Killip class-Systolic Blood Pressure-Hx Angina-Time from onset of symptoms-Heart Rate-Antiarrhythmics-Randomised treatment                                                                                                                                                                                                                                                                                                                                                                                                                                                                                                                                                                                                                                                                                                                                                                                                                                                              |
| Lehto, <sup>9</sup> 2005*      | Age-Heart Rate-Prior MI-Smoking-Diabetes Mellitus-Hx Hypercholesterolemia-Hx chronic Heart Failure-Killip class-Thrombolytic use-Statin use                                                                                                                                                                                                                                                                                                                                                                                                                                                                                                                                                                                                                                                                                                                                                                                                                                                                                                                     |
| Kober, <sup>17</sup> 2006*     | Age-Pulse Pressure-Baseline Creatinine-Heart Rate-Weight-Anterior MI-New Left Bundle Branch Block-Smoking status-Killip class at qualifying MI-Hx Angina-Hx Heart Failure-Hx Unstable Angina- Hx Peripheral Arterial Disease- Hx Alcohol abuse-Hx Stroke- Hx Chronic Obstructive Pulmonary Disease-Prior MI-Prior Percutaneous Transluminal Coronary Angioplasty, Coronary Artery Bypass Graft or Thrombolytics-Previous Hospitalizations-Renal function-Diabetes Mellitus-Country of enrollment-Randomized treatment                                                                                                                                                                                                                                                                                                                                                                                                                                                                                                                                           |
| Tangelder, <sup>24</sup> 2008  | NR                                                                                                                                                                                                                                                                                                                                                                                                                                                                                                                                                                                                                                                                                                                                                                                                                                                                                                                                                                                                                                                              |
| Lopes, <sup>23</sup> 2009*#    | Age-Gender-US patients-Height-Weight-Systolic Blood Pressure-Diastolic Blood Pressure-Heart Rate-Killip class-MI location-Hx MI-Hx Coronary Artery Disease-Hx Congestive Heart Failure-Hx Diabetes-Hx Hypertension-Hx Stroke-Hx Transient Ischaemic Attack-Prior Percutaneous Coronary Intervention-Prior Coronary Artery Bypass Grafting-Current smoking-Creatinine clearance-Creatine Kinase level-Creatine Kinase MB level-Troponin-Brain Natriuretic Peptide-Intraaortic Balloon Pump-Automatic Implantable Cardioverter Defibrillator-Percutaneous Coronary Intervention-Cardiac Surgery-Red Blood Cell Transfusion-Recatheterization-RePercutaneous Coronary Intervention-Stents-Moderate or severe Bleed-Congestive Heart Failure-Shock-Cardiac Arrest-Deep Vein Thrombosis-Acute Ventricular Septal Defect-Recurrent MI-Recurrent ischemia-Renal Failure-Pulmonary Embolism-Stroke-Cardiac Tamponade-Ventricular Fibrillation-Ventricular Tachycardia-Ventricular Rupture-Pericarditis-Acute Mitral Regurgitation-Asystole-Acute Atrioventricular Block |
| <b>Non Randomized Trials</b>   |                                                                                                                                                                                                                                                                                                                                                                                                                                                                                                                                                                                                                                                                                                                                                                                                                                                                                                                                                                                                                                                                 |
| <b>Community studies</b>       |                                                                                                                                                                                                                                                                                                                                                                                                                                                                                                                                                                                                                                                                                                                                                                                                                                                                                                                                                                                                                                                                 |
| Goldberg, <sup>28</sup> 1990   | Age-Gender-MI order-Congestive Heart Failure-Cardiogenic Shock-Ventricular Tachycardia-Ventricular Fibrillation-Drug therapy                                                                                                                                                                                                                                                                                                                                                                                                                                                                                                                                                                                                                                                                                                                                                                                                                                                                                                                                    |
| Saczynski, <sup>12</sup> 2009  | Age-Gender-Hx Angina-Hx Hypertension-Hx Diabetes Mellitus-Hx Stroke-Hx Heart Failure-Previous MI-Q wave-Anterior MI-ST segment elevation-Heart Failure-Cardiogenic Shock-Stroke- Length of hospital stay                                                                                                                                                                                                                                                                                                                                                                                                                                                                                                                                                                                                                                                                                                                                                                                                                                                        |
| <b>Registries</b>              |                                                                                                                                                                                                                                                                                                                                                                                                                                                                                                                                                                                                                                                                                                                                                                                                                                                                                                                                                                                                                                                                 |
| Behar, <sup>1</sup> 1992       | Age-Gender-Hx MI-Diabetes Mellitus-Congestive Heart Failure-Serum LDH level > 4 times the upper normal limit at the respective participating centre                                                                                                                                                                                                                                                                                                                                                                                                                                                                                                                                                                                                                                                                                                                                                                                                                                                                                                             |
| Eldar, <sup>3</sup> 1998       | Age-Gender-Previous MI-Diabetes Mellitus-Congestive Heart Failure                                                                                                                                                                                                                                                                                                                                                                                                                                                                                                                                                                                                                                                                                                                                                                                                                                                                                                                                                                                               |
| Rathore, <sup>6</sup> 2000     | Age-Race-Gender-Heart Rate-Systolic Blood Pressure-Killip class-Hypertension-Time to presentation-Current smoker-Anterior MI-Prior Cerebrovascular Disease-Prior MI-Antiarrhythmic use                                                                                                                                                                                                                                                                                                                                                                                                                                                                                                                                                                                                                                                                                                                                                                                                                                                                          |
| Mehta, <sup>10</sup> 2003      | Age-Gender-ST segment elevation-Non ST segment elevation-Unstable Angina-US patients-Medical Hx-Prior Angina-Prior MI-Prior Stroke-Prior Congestive Heart Failure-Prior Percutaneous Coronary Intervention-Prior Coronary Artery Bypass Surgery-Current smoker-Hypertension-Diabetes Mellitus-Hyperlipidemia-Medications used-Heart Rate-Systolic Blood Pressure-Diastolic Blood Pressure-Serum Creatinine-Cardiac Arrest-Killip class-Q waves-Left Bundle Branch Block                                                                                                                                                                                                                                                                                                                                                                                                                                                                                                                                                                                         |
| Kinjo, <sup>4</sup> 2003       | Age-Gender-Diabetes Mellitus-Hypertension-Current smoking-Previous MI-Previous Cerebrovascular Disease-Systolic Blood Pressure < 100 mm Hg-Heart Rate ≥ 100 beats/min-Killip class IV-Left Anterior Descending Artery-Multivessel Disease-TIMI flow grade 3                                                                                                                                                                                                                                                                                                                                                                                                                                                                                                                                                                                                                                                                                                                                                                                                     |
| Lau, <sup>32</sup> 2009        | Age-Increased Heart Rate-Elevated Cardiac Biomarkers-ST segment changes-Cardiogenic Shock-Impaired Renal function-Hx Ischemic Heart Disease or Heart Failure-Absence of Percutaneous Coronary Intervention                                                                                                                                                                                                                                                                                                                                                                                                                                                                                                                                                                                                                                                                                                                                                                                                                                                      |

## Appendix 2. Continued

| Source                               | Adjustment Variables                                                                                                                                                                                                                                                            |
|--------------------------------------|---------------------------------------------------------------------------------------------------------------------------------------------------------------------------------------------------------------------------------------------------------------------------------|
| <b>Convenience sample</b>            |                                                                                                                                                                                                                                                                                 |
| Klass, <sup>30</sup> 1970            | NR                                                                                                                                                                                                                                                                              |
| Cristal, <sup>27</sup> 1976          | NR                                                                                                                                                                                                                                                                              |
| Liem, <sup>48</sup> 1976             | NR                                                                                                                                                                                                                                                                              |
| Liberthson, <sup>33</sup> 1976       | NR                                                                                                                                                                                                                                                                              |
| Hunt, <sup>29</sup> 1978             | NR                                                                                                                                                                                                                                                                              |
| Sugiura, <sup>42</sup> 1985          | NR                                                                                                                                                                                                                                                                              |
| Bigger, <sup>25</sup> 1985           | Age-Hx MI-Hx Angina pectoris-Cigarette smoking-Diabetes Mellitus-Left Ventricular Failure-Enlarged heart (x-ray)-Anterior MI-Creatine Kinase > 1000-Pulmonary vascular congestion-Diuretic therapy-Antiarrhythmic drugs-Beta Blocker therapy-Digitalis                          |
| Nielsen, <sup>49</sup> 1991          | NR                                                                                                                                                                                                                                                                              |
| Petretta, <sup>36</sup> 1991         | NR                                                                                                                                                                                                                                                                              |
| Kobayashi, <sup>47</sup> 1992        | NR                                                                                                                                                                                                                                                                              |
| Suarez, <sup>41</sup> 1995           | NR                                                                                                                                                                                                                                                                              |
| Madias, <sup>34</sup> 1996           | NR                                                                                                                                                                                                                                                                              |
| Sakata, <sup>38</sup> 1997           | Age-Gender-Peak Creatine Kinase levels-Left Ventricular Ejection Fraction-Hypertension-Diabetes Mellitus-Hypercholesterolemia-Hx MI-Smoking                                                                                                                                     |
| Galcera Thomas, <sup>45</sup> 1999   | NR                                                                                                                                                                                                                                                                              |
| Mahon, <sup>35</sup> 2000*#          | Age-Gender-ST depression-ST elevation-T wave inversion-Left Bundle Branch Block-Q wave-Smoking-Hypertension-Diabetes Mellitus-Family Hx-Previous MI-Thrombolysis-Coronary Care Unit-Left Ventricular Failure-Cardiogenic Shock                                                  |
| Janion, <sup>46</sup> 2001           | NR                                                                                                                                                                                                                                                                              |
| Cicek, <sup>26</sup> 2003            | NR                                                                                                                                                                                                                                                                              |
| Asanin, <sup>13</sup> 2005*#         | Age-Gender-Hx Hypertension-Hx Diabetes Mellitus-Previous MI-Hx Angina Pectoris-Thrombolysis-Peak Creatine Phosphokinase level-Beta Blocker therapy-Heart Failure during hospitalization                                                                                         |
| Rastenyte, <sup>37</sup> 2005        | NR                                                                                                                                                                                                                                                                              |
| Trappolini, <sup>15</sup> 2006*#     | Age-Gender-Ischemic Events-Coronary Risk Factors-Killip class-Thrombolytic therapy-Pericarditis                                                                                                                                                                                 |
| Siu, <sup>40</sup> 2007              | NR                                                                                                                                                                                                                                                                              |
| Li, <sup>14</sup> 2008               | Age-Killip class III/IV-Failure of revascularization                                                                                                                                                                                                                            |
| Sankaranarayanan, <sup>39</sup> 2008 | NR                                                                                                                                                                                                                                                                              |
| Koracevic, <sup>31</sup> 2008        | NR                                                                                                                                                                                                                                                                              |
| Torres, <sup>43</sup> 2008*#         | Age-Gender-Hx Diabetes Mellitus-Smoking-Hx Dyslipidemia-Hx Hypertension-Obesity-Hx Angina-Hx MI-Prior Percutaneous Transluminal Coronary Angioplasty or Coronary Artery Bypass Graft-Heart Failure-Coronary angiography-Reperfusion therapy-Severe Left Ventricular Dysfunction |
| Cui, <sup>44</sup> 2008              | NR                                                                                                                                                                                                                                                                              |
| Berton, <sup>5</sup> 2009*           | Age-Diabetes Mellitus-Peak Creatine Kinase-Killip class > 1-Estimate Glomerular Filtration Rate-Thrombolysis-Left Ventricular Ejection Fraction                                                                                                                                 |

AF, Atrial Fibrillation; MI, Myocardial Infarction; Hx, History; NR, Not Reporting multivariate analysis

\* Studies adjusting for Age, Diabetes, Heart Failure and Coronary Revascularization

# Studies adjusting for Age, Diabetes, Hypertension, Prior MI, Heart Failure and Coronary Revascularization
